# Supplementary material
Source: PubMed Central journal article supplement (PMC5068540)
Supplement: JVI.00635-16_zjv999182076so1.pdf [file JVI.00635-16_zjv999182076so1.pdf]

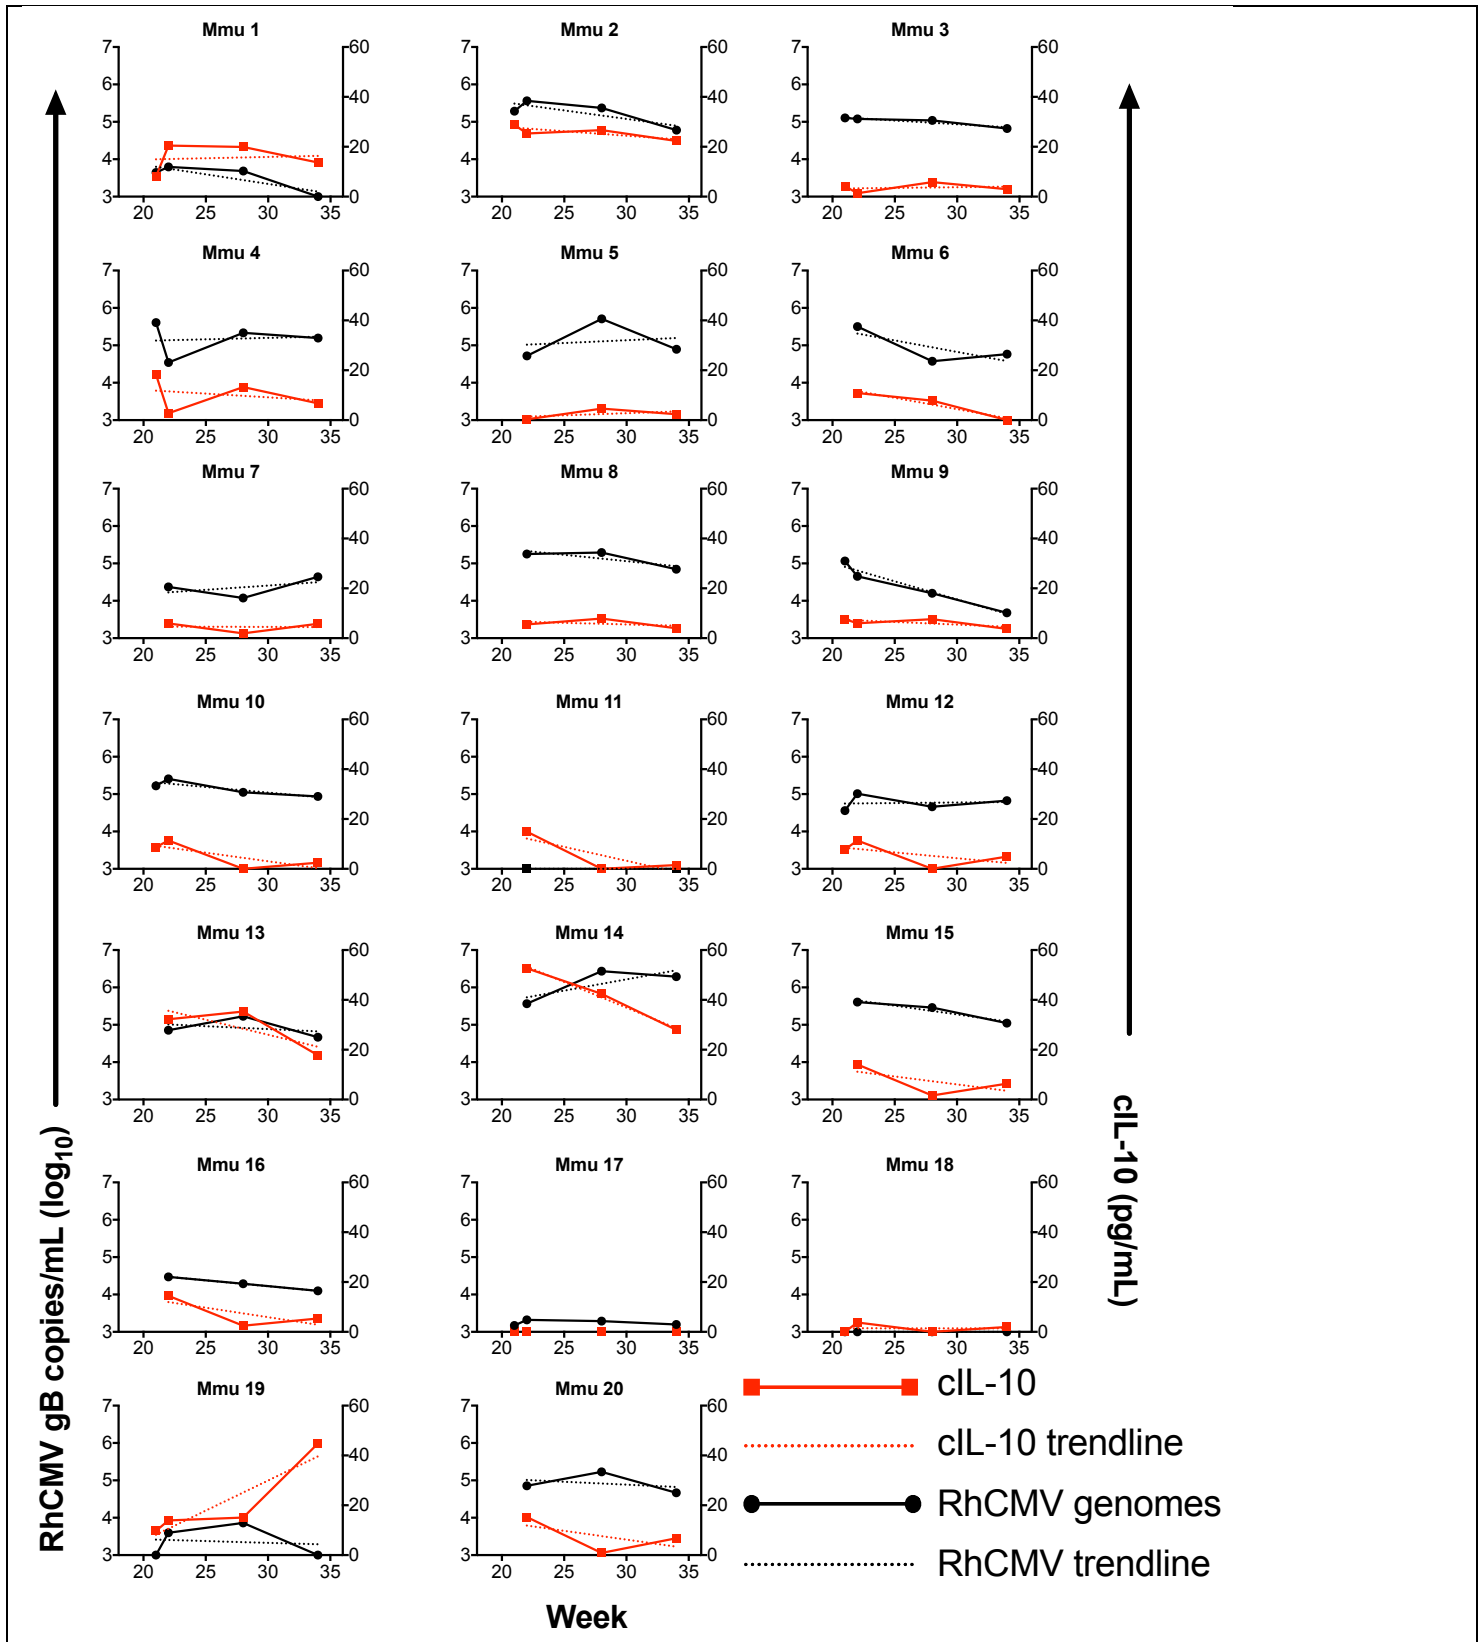

Supplemental Figure 1. Longitudinal cIL-10 production mirrors viral shedding patterns. Production of cIL-10 by RhCMV antigen-stimulated PBMC (red) isolated from 20 long-term RhCMV-infected rhesus macaques (Mmu 1 – Mmu 20) was graphed over time alongside RhCMV genome copy numbers per mL of saliva ( $\log_{10}$ ) (black) at concurrent time points on a per animal basis (3-4 per Mmu). The dotted lines represent the trendline for each data set determined by linear regression.
